# Supplementary material for: Tethered trinuclear cyclometalated platinum(ii) complexes: from crystal engineering to tunable emission energyElectronic supplementary information (ESI) available: schemetic drawings for 1–4, perspective view of cation of 4(ClO4)3·1.5Et2O·CH3CN and refinement details for X-ray crystallography. See http://www.rsc.org/suppdata/cc/b2/b200723a/
Source: Royal Society of Chemistry journal article supplement (doi:10.1039/b200723a), 2002-03-26
Supplement: b200723a.doc [file b200723a.doc]

**Supplementary Material (ESI) for Chemical Communications**

**This journal is © The Royal Society of Chemistry 2002**

Tethered trinuclear cyclometalated platinum(II) complexes: from crystal engineering to tunable emission energy

Wei Lu, Nianyong Zhu and Chi-Ming Che*

*Department of Chemistry and the HKU-CAS Joint Laboratory on New Materials, The University of Hong Kong, Pokfulam Road, Hong Kong SAR, China. Fax: +852 2859-2154; E-mail: cmche@hku.hk*

Schematic drawing for the complexes studied in the present communication, perspective view of the cation of **4**(ClO4)3·1.5Et2O·CH3CN and refinement details for crystals in the present study.

**Scheme S1**

**Fig. S1** ORTEP view of the cation of **4**(ClO4)3·1.5Et2O·CH3CN with 20% possibility ellipsoids.

**Supplementary Details for X-ray Crystallography**

**Crystal 1**(ClO4)3:

The images were interpreted and intensities integrated using program DENZO.1 The structure was solved by direct methods employing SIR-97 program2 on PC. The Pt, P and many non-hydrogen atoms were located according to the direct methods and the successive least-square Fourier cycles. The positions of the other non-hydrogen atoms were found after successful refinement by full-matrix least-squares using program SHELXL-973 on PC. Since the mirror molecules occupy the same lattice points, disorder exists. The mirror molecules share the mirror (0, 0, 0.25) and only atoms on the plane (C16, Pt1, N1 and C9) have common positions for the mirror molecules. The other atoms are disordered according to this mirror. Since D3-axis (2/3, 1/3, Z) go through C16–C17 bond, only one sixth of a molecule constitutes the asymmetric unit of the unit cell. Disorder exists also for ClO4– anions employing also D3 symmetry (one axis is (2/3, 1/3, Z) and the other is (0, 0, Z)).

One crystallographic asymmetric unit consists of one sixth of formula unit, including half ClO4– anion in two different positions. In the final stage of least-squares refinement, only Pt, P, N1, C7 to C9, and C15 to C17 were refined anisotropically, the other non-hydrogen isotropically. Aromatic H atoms were generated by program SHELXL-97.3 The positions of H atom were calculated based on riding mode with thermal parameters equal to 1.2 times that of the associated C atoms, and participated in the calculation of final R-indices.5

**Crystal 2**(ClO4)3·H2O:

The images were interpreted and intensities integrated using program DENZO.1 The structure was solved by direct methods employing SHELXS-974 program on PC. The Pt atoms were located according to the direct. The positions of the other non-hydrogen atoms were found after successful refinement by full-matrix least-squares using program SHELXL-973 on PC. Each C^N^N ligand employing two N and one C atoms coordinates to Pt atom. Due to the symmetry of the ligand, one N and the C atoms should share the same positions. However, the reported structure assumes the location of their positions respectively. This does not affect the results since the two atoms are almost crystallographically undistinguishable. Please keep in mind about this assumption. Three ClO4– anions were located and one of them has three O atoms disordered. One water solvent molecule was also located.

One crystallographic asymmetric unit consists of one formula unit, including three ClO4– anions and one water solvent molecule. In the final stage of least-squares refinement, the four O atoms of the disordered ClO4– anion were refined isotropically and the other non-hydrogen were refined anisotropically. The H atoms (except the two on water molecule) were generated by program SHELXL-97.3 The positions of H atom were calculated based on riding mode with thermal parameters equal to 1.2 times that of the associated C atoms, and participated in the calculation of final R-indices.5

**Crystal 2**(ClO4)3·2Et2O·CH3CN:

The images were interpreted and intensities integrated using program DENZO.1 The Pt, P and many non-hydrogen atoms were located according to the direct methods and the successive least-square Fourier cycles. The positions of the other non-hydrogen atoms were found after successful refinement by full-matrix least-squares using program SHELXL-973 on PC. Three ClO4– anions were located and two of them are disordered in the mode of rotation along one Cl–O bond. Two Et2O and one CH3CN solvent molecules were also located, in which one Et2O is disordered into two different sets of positions. The oppositely coordinated C and N atoms of the tridentate ligand could not be distinguished by X-ray crystallography. In spite of this, their positions were located according to their relative thermal parameters.

One crystallographic asymmetric unit consists of one formula unit, including three ClO4– anions, two Et2O and one CH3CN solvent molecules. In the final stage of least-squares refinement, non-hydrogen atoms of the solvent molecules and the O atoms of ClO4– anions were refined isotropically, and the other non-hydrogen were refined anisotropically. The H atoms were generated by program SHELXL-97.3 The positions of H atom were calculated based on riding mode with thermal parameters equal to 1.2 times that of the associated C atoms, and participated in the calculation of final R-indices.5

**Crystal 4**(ClO4)3·1.5Et2O·CH3CN:

The images were interpreted and intensities integrated using program DENZO.1 The structure was solved by direct methods employing SHELXS-97 program4 on PC The Pt, P and many non-hydrogen atoms were located according to the direct. The positions of the other non-hydrogen atoms were found after successful refinement by full-matrix least-squares using program SHELXL-973 on PC. Three ClO4– anions on three positions were found, in which two of them are disordered. The disordered ClO4– anions are treated by two sets of O atoms each with half occupancy, meanwhile restrains were applied to assume similar Cl–O bond lengths. Solvent molecules are found with high thermal parameters. One CH3CN, one and a half Et2O molecules were located. For convergence of the structure refinement, restrains were applied to the N–C, C–C and O–C bond lengths.

One crystallographic asymmetric unit consists of one formula unit, including three ClO4– anions, one CH3CN and one and a half Et2O solvent molecules. In the final stage of least-squares refinement, except the O atoms of ClO4– anions and the atoms of solvent molecules (isotropically), the other non-hydrogen were refined anisotropically. The H atoms within the cation were generated by program SHELXL-97.3 The positions of H atom were calculated based on riding mode with thermal parameters equal to 1.2 times that of the associated C atoms, and participated in the calculation of final R-indices.5

Footnotes:

1. Z. Otwinowski and W. Minor, Processing of X-ray Diffraction Data Collected in Oscillation Mode, Methods in Enzymology, Vol. 276: Molecular Crystallogrphy, Part A, pp. 307-326, 1997. C. W. Carter and R. M. Sweet Jr., Eds., Academic Press.
2. A. Altomare, M. C. Burla, M. Camalli, G. Cascarano, C. Giacovazzo, A. Guagliardi, A. G. G. Moliterni, G. polidori and R., Spagna, Sir97: a new tool for crystal structyre determination and refinement, *J. Appl.* *Cryst*., 1998, **32**, 115.
3. SHELXL97, G. M. Sheldrick, 1997. SHELX97. Programs for Crystal Structure Analysis (Release 97-2). University of Goetingen, Germany.
4. SHELXS97, G. M. Sheldrick, 1997. SHELX97. Programs for Crystal Structure Analysis (Release 97-2). University of Goetingen, Germany.
5. Since the structure refinements are against F2, R-indices based on F2 are larger than those based on F. For comparison with older refinements based on F and an OMIT threshold, a conventional index R1 based on observed F values larger than 4(Fo) is also given (corresponding to Intensity ≥ 2(I)). *wR*2 = {[w(Fo2–Fc2)2]/[w(Fo2)2]}1/2, *R*1 = Fo–Fc/Fo. The Goodness of Fit is always based on F2: *GooF* = *S* = {[w(Fo2–Fc2)2]/(*n*–*p*)]}1/2, where *n* is the number of reflections and *p* is the number of parameters refined. The weighting scheme is w = 1/[2(Fo2)+(*a*P)2+*b*P], where P = [2Fc2+Max(Fo2,0)]/3.
